# Supplementary material for: The Giant Resin Bee, Megachile sculpturalis Smith: New Distributional Records for the Mid- and Gulf-south USA
Source: Biodivers Data J. 2015 Oct 26;(3):e6733. doi: 10.3897/BDJ.3.e6733 (PMC4678803; doi:10.3897/BDJ.3.e6733)
Supplement: Supplementary material 1 — Supplementary table 1 - occurence data [file biodiversity_data_journal-3-e6733-s001.xlsx]

## Sheet: data
UID	ST	County	Locality details	Inferred Latitude	Inferred Longitude	Day	Month	Year	Type	Source	Deposition
1	MD	Prince George	Bee Lab, Beltsville	39.0254	-76.924	17-18	7	1997	Literature	Battra 1998
2	NC	Wake	NC State, Raleigh	35.7846	-78.6821	15	6	1994	Literature	Mangam and Brooks 1997
3	AL	Lee	Bowden Dr., Auburn, Lee Co., AL	32.6019	-85.469		6	1999	Literature	Kondo, et al. 2000
4	AL	Lee	N. Ross St., Auburn, Lee Co., AL	32.6132	-85.4759	7	7	1999	Literature	Kondo, et al. 2000
5	AL	Lee	Longwood Dr., Auburn, Lee Co., AL	32.5578	-85.4593	1	8	1999	Literature	Kondo, et al. 2000
6	AL	Lee	Canary Dr., Auburn, Lee Co., AL	32.5614	-85.4905		8	1999	Literature	Kondo, et al. 2000
7	AL	Lee	Lee Co., Auburn, AL	32.6081	-85.4813		5	2000	Literature	Kondo, et al. 2000
8	AL	Calhoun	Jacksonville, Calhoun Co., AL	33.8137	-85.7619		6	2000	Literature	Kondo, et al. 2000
9	AL	Lee	Butternut Dr., Auburn, Lee Co., AL	32.6122	-85.455	29	5	2000	Literature	Kondo, et al. 2000
10	AL	Lee	Butternut Dr., Auburn, Lee Co., AL	32.6122	-85.455	8-9	6	2000	Literature	Kondo, et al. 2000
11	AL	Lee	Dean Rd., Auburn, Lee Co., AL	32.5962	-85.4648	8-9	6	2000	Literature	Kondo, et al. 2000
12	AL	Lee	Waverly Parkway, Opelika, Lee Co., AL	32.65	-85.4194	11	6	2000	Literature	Kondo, et al. 2000
13	AL	Limestone	Athens, Limestone Co., AL	34.7866	-86.9572	6	7	2000	Literature	Kondo, et al. 2000
14	AL	Lee	Longwood Dr., Auburn, Lee Co., AL	32.5578	-85.4593	7	7	2000	Literature	Kondo, et al. 2000
15	MO	Barry	Trap 1; blue vane trap on cleared ridge top for cattle grazing, Flowering plants nearby: water hemlock, poke, mullein, blackberries, and Ozark chinquapin	36.6319	-93.8182	06/28/15 - 07/03/15		2015	Specimen	This study	UAAM
16	MO	Barry	Trap 5; blue vane trap on cleared ridge top for cattle grazing, Flowering plants nearby: water hemlock and Ozark chinquapin	36.6275	-93.8198	06/21/15 - 06/28/15	6	2015	Specimen	This study	UAAM
17	TN	Henderson	[Address withheld] Lexington, Tennessee	35.6819	-88.3652	22	6	2015	Specimen	This study	BLCU
18	AR	Washington	Fayetteville, UofA	36.0723	-94.1736	2	7	2012	Specimen	This study	UAAM
19	AR	Washington	Fayetteville, World Peace Wetland Prairie	36.0519	-94.1727	29	6	2011	Specimen	This study	UAAM
20	MS	Grenada	Scoby	33.8928	-89.9192	4	7	2014	Specimen	This study	MEM/BLCU/ K. A. Parys Collection
21	MS	Lafayette	Oxford, UofM Campus	34.3652	-89.534	25	7	2005	Specimen	This study	UMIC
22	MS	Lafayette	Oxford, UofM Campus	34.3652	-89.534	15	4	2008	Specimen	This study	UMIC
23	MS	Tallahatchie	Paynes	33.9247	-90.0647	23	6	2015	Specimen	This study	MEM
24	MS	Tallahatchie	Paynes	33.9247	-90.0647	28	7	2015	Specimen	This study	MEM/BLCU/ KA Parys Collection
25	MS	Oktibbeha	3 mi E of Starkville	33.4297	-88.7336	20	6	2008	Specimen	This study	MEM
26	MS	Oktibbeha	3 mi E of Starkville	33.4297	-88.7336	27	6	2008	Specimen	This study	MEM
27	MS	Oktibbeha	3 mi E of Starkville	33.4297	-88.7336	29	6	2008	Specimen	This study	MEM
28	MS	Pearl River	McNeill	30.6688	-89.6384	2-7	7	2011	Specimen	This study	B Sampson Collection
29	MS	Yalobusha	4 mi NE of Coffeeville	33.9857	-89.7685	6	8	2004	Specimen	This study	MEM
30	TN	Rutherford	Stone’s River Glade	35.8733	-86.4358	23	7	2009	Specimen	This study	MEM
31	TX	Nacogdoches	SFASU campus	31.6206	-94.6475				Specimen	This study	SFAC
32	MO	St. Louis City	City Museum	38.6336	-90.2004	5	7	2004	Specimen	This study	M Arduser Collection
33	MO	Lincoln	Cuivre River State Park	39.0281	-90.9268		6	2006	Specimen	This study	M Arduser Collection
33	MO	St. Louis City	St. Louis Zoo	38.6356	-90.2905		6	2007	Specimen	This study	M Arduser Collection
34	MO	Pettis	Drover's Prairie (south of Sedalia about 10 miles)	38.5319	-93.2952	10	7	2010	Specimen	This study	M Arduser Collection
35	AR	Searcy	Ozark Mountains (Photo#307644)	35.2465	-91.7264	19	7	2009	Observation	Bugguide	http://bugguide.net/node/view/15541; Accessed 22-Aug-2015
36	LA	Lafayette	Lafayette, Lafayette Parish, Louisiana, USA (Photo# 775677, 775678, 775679, 775682)	30.2234	-92.0238	24	5	2013	Observation	Bugguide	http://bugguide.net/node/view/15541; Accessed 22-Aug-2015
37	MS	Grenada	Photo# 1094101, 1094102	33.7715	-89.8192	1	7	2015	Observation	Bugguide	http://bugguide.net/node/view/15541; Accessed 22-Aug-2015
38	MS	Neshoba	2 miles north of the village of House (Photo# 816135, 816136, 816137, 816139)	32.7553	-89.1138	28	7	2013	Observation	Bugguide	http://bugguide.net/node/view/15541; Accessed 22-Aug-2015
39	MS	Neshoba	Philadelphia	32.7745	-89.118		7	2015	Observation	This study	Harris, J (Mississippi State University), personal communication
39	MS	Noxubee	Noxubee National Wildlife Refuge	33.2707	-88.784				Observation	This study	Brown, R (MEM- Mississippi State University), personal communication
40	MS	Pearl River	McNeill (Photo#568328, 568329)	30.6688	-89.6384	5	6	2011	Observation	Bugguide	http://bugguide.net/node/view/15541; Accessed 22-Aug-2015
41	MO	St. Louis	Webster Groves	38.5908	-90.3571		7	2004-2010	Observation	This study	Ardruser M, personal communication
42	TN	Blount	Great Smoky Mountains National Park - Abrams Creek Area, Blount County, Tennessee, USA (Photo# 311720, 311722, 311723, 311724)	35.6114	-83.9331	19	7	2009	Observation	Bugguide	http://bugguide.net/node/view/15541; Accessed 22-Aug-2015
43	TN	Campbell	Royal Blue Wildlife Management Area (Photo# 464723)	36.426	-84.2979	18	9	2010	Observation	Bugguide	http://bugguide.net/node/view/15541; Accessed 22-Aug-2015
44	TN	Carter	Sycamore Shoals State Historic Area (Photo# 1117780, 1117781, 1117782)	36.3433	-82.255	25	7	2015	Observation	Bugguide	http://bugguide.net/node/view/15541; Accessed 22-Aug-2015
45	TN	Hancock	Kyle’s Ford (Photo# 959862, 959863)	36.5717	-83.0426	18	7	2014	Observation	Bugguide	http://bugguide.net/node/view/15541; Accessed 22-Aug-2015
46	TN	Rutherford	Rockvale (Photo#954354, 954357, 954358, 954359)	35.7573	-86.5318	10	7	2014	Observation	Bugguide	http://bugguide.net/node/view/15541; Accessed 22-Aug-2015
47	TX	Fannin	Honey Grove (Photo# 1111092, 1111095) [is also record #1809414 from GBIF-iNaturalist]	33.583	-95.9097	21	7	2015	Observation	Bugguide	http://bugguide.net/node/view/15541; Accessed 22-Aug-2015
48	TX	Tarrant	Fort Worth (photo#938961, 938962, 938963, 938964)	32.7425	-97.3443	15	6	2014	Observation	Bugguide	http://bugguide.net/node/view/15541; Accessed 22-Aug-2015
49	TX	Nacodoches	Nacodoches (Photo# 788463)	31.6124	-94.6523	26	6	2013	Observation	Bugguide	http://bugguide.net/node/view/15541; Accessed 22-Aug-2015
50	TX	Williamson	North Austin, Hill Country County, Texas, USA (Photo# 1097836)	30.3108	-97.9374	7	7	2015	Observation	Bugguide	http://bugguide.net/node/view/15541; Accessed 22-Aug-2015
51	NY	Tompkins	BeeBee Lake, Cornell Campus, Ithaca	42.4508	-76.4768	7	9	1997	Literature	Ascher 2001
52	NY	Tompkins	Cornell Plantations, Ithaca	42.4528	-76.464	12	9	1998	Literature	Ascher 2001
53	NY	Tompkins	Penny Lane, Commonland Communtity, Ithaca	42.4242	-76.4674	16	7	2000	Literature	Ascher 2001
54	NY	Tompkins	Penny Lane, Commonland Communtity, Ithaca	42.4242	-76.4674	21-Jul to 12-Aug		2000	Literature	Ascher 2001
55	NY	Onondaga	13 mi S of Syracuse	42.8677	-76.1229	5	8	2000	Literature	Ascher 2001
56	NY	Tompkins	Cornell University, Minns Garden, Ithaca	42.4478	-76.4775	13-14	8	2000	Literature	Ascher 2001
57	VA	Augusta	Staunton	38.1492	-79.0721	1	8	2000	Literature	Ascher 2001
58	NY	Suffolk	Gardiners Island	41.094	-72.0997				Literature	Ascher, et al. 2014
59	PA	Bradford		41.7992	-76.5007				Literature	Ascher, et al. 2014
60	PA	Centre		40.9156	-77.7657				Literature	Ascher, et al. 2014
61	PA	Clinton		41.2492	-77.6048				Literature	Ascher, et al. 2014
62	PA	Dauphin		40.4426	-76.7892				Literature	Ascher, et al. 2014
63	PA	Erie		41.9905	-80.0208				Literature	Ascher, et al. 2014
64	PA	Huntingdon		40.4177	-77.9931				Literature	Ascher, et al. 2014
65	PA	Jefferson		41.1521	-79.0041				Literature	Ascher, et al. 2014
66	PA	Tioga		41.7663	-77.2492				Literature	Ascher, et al. 2014
67	PA	Calvert	Dominion Cove Point Liquefied Natural Gas facility and vicinity	38.3878	-76.4095	22-23	6	2007	Literature	Droege and Shapiro 2011
68	WI	Vernon	S805 Irish Ridge Rd., Cashton, WI	43.701	-90.6864			2008	Literature	Groves, et al. 2010
69	WI	Monroe	S2185 & S3718 County Highway D, Westby, WI	43.659	-90.7386			2008	Literature	Groves, et al. 2010
70	WI	Monroe	1103 Habhegger Ave., Sparta, WI	43.9547	-90.8025			2008	Literature	Groves, et al. 2010
71	WI	Monroe	S1028 90 Meter Dr., Westby, WI	43.6862	-90.8754			2008	Literature	Groves, et al. 2010
72	FL	Alachua	Kanapaha Prairie South	29.5342	-82.4356	2	6	2008	Literature	Hall and Ascher 2010
73	KS	Douglas	within Lawrence city limits (adjacent to main University campus)	38.9542	-95.2558	28	6	2008	Literature	Hinjosa-Diaz 2008
74	OH	Summit	Cuyahoga Valley National Park, Ohio, Summit County (41o16’N, 81o33’ W)	41.2667	-81.55		7	2004	Literature	Kinyo 2005
75	NY	Monroe	Rochester, NY	43.1605	-77.6116		7	2010	Literature	Laport and Minckley 2012
76	CT	Fairfield	Stratford, Long Beach	41.1531	-73.1476	7	8	2003	Literature	Maier 2005
77	CT	Hartford	Farmington, Hill-Stead Museum	41.7219	-72.8203	20	7	2004	Literature	Maier 2005
78	CT	Hartford	Farmington, Hill-Stead Museum	41.7219	-72.8203	24	7	2004	Literature	Maier 2005
79	CT	Hartford	West Hartford, Sunset Farm Road	41.7566	-72.7762	3	8	2004	Literature	Maier 2005
80	CT	Litchfield	Norfolk, Great Mountain Forest	41.9681	-73.225	10	7	2004	Literature	Maier 2005
81	CT	Middlesex	Haddam. Higganum Meadows Wildfife Area	41.5165	-72.5285	27	8	2000	Literature	Maier 2005
82	CT	New Haven	Conn Agric Exp Stat 123 Huntington St	41.3311	-72.9191	23	7	2001	Literature	Maier 2005
83	CT	New Haven	Conn Agric Exp Stat 123 Huntington St	41.3311	-72.9191	19	7	2002	Literature	Maier 2005
84	CT	New London	Groton, Bluff Point Coastal Reserve	41.326	-72.0287	24	8	2004	Literature	Maier 2005
85	CT	New London	Voluntown, Pachuaug State Forest, field along Erickson Wildlife Marsh	41.6105	-71.8267	17	7	2004	Literature	Maier 2005
86	CT	Fairfield	Danbury, 0.17 km ESE jct. US Hwy. 7 and Starrs Plain Rd., 41.346668N, 73.467128W	41.3467	-73.4671	28	8	2008	Literature	Maier 2006
87	CT	Fairfield	Redding, 0.6 km SW jct. US Hwy. 7 and Florida Hill Rd., 41.282108N, 73.445768W,	41.2821	-73.4458	28	8	2008	Literature	Maier 2006
88	CT	Litchfield	Barkhamsted, 0.6 km ENE Winchester town line on US Hwy., 44, 41.911478N, 72.040308W	41.9115	-72.0403	7	8	2007	Literature	Maier 2006
89	CT	Middlesex	Deep River, St. Rte. 80, Winthrop Cem., 41.363508N, 72.486608W	41.3635	-72.4866	26	8	2008	Literature	Maier 2006
90	CT	Middlesex	Essex, jct. St. Rte. 154 and Dump Rd . , 41.364278N, 72.423908W,	41.3643	-72.4239	10	8	2008	Literature	Maier 2006
91	CT	Middlesex	Essex, jct. St. Rte. 154 and Dump Rd . , 41.364278N, 72.423908W,	41.3643	-72.4239	26	8	2008	Literature	Maier 2006
92	CT	Middlesex	Haddam, Eagle Landing St. Pk., St. Rte. 82, 41.449618N, 72.466868W	41.4496	-72.4669	26	8	2008	Literature	Maier 2006
93	CT	New Haven	New Haven, West River Mem. Pk., near Nature Center, 41.309338N, 72.954358W	41.3093	-72.9544	5	8	2008	Literature	Maier 2006
94	CT	New London	Salem, 0.3 km NW jct. St. Rte. 82 and 85, 41.478678N, 72.267188W	41.4787	-72.2672	20	8	2008	Literature	Maier 2006
95	CT	Tolland	Tolland, 0.2 km S jct. St. Rte. 32 and Plains Rd., 41.927048N, 72.306858W	41.927	-72.3069	20	8	2008	Literature	Maier 2006
96	CT	Windham	Plainfield, 0.1 km ENE jct. St. Rte. 12 and Lathrop Rd., 41.667818N, 71.914428W	41.6678	-71.9144	22	8	2008	Literature	Maier 2006
97	MA	Plymouth	Plymouth, Myles Standish St. For., near jct. Cutter Field and Doctor’s Pond Rd	41.8387	-70.6907	12	7	2006	Literature	Maier 2006
98	MA	Worcester	Oxford, Int. Hwy. 395, 0.2 km S overpass for Millbury Rd., 42.141458N, 71.857168W	42.1415	-71.8572	15	8	2008	Literature	Maier 2006
99	PA	Monroe	Tobyhanna, 0.14 kmNEjct. St. Rte. 115 and Maple Rd., 41.086348N, 75.583588W	41.0863	-75.5836	8	7	2008	Literature	Maier 2006
100	NC	Wake		35.7993	-78.6483	25	6	1994	Literature	Mangam and Brooks 1997
101	NC	Mecklenburg	Davidson	35.5005	-80.8479	5	8	1994	Literature	Mangam and Brooks 1997
102	NC	Wake	NC State, Raleigh	35.7846	-78.6821		6	1995	Literature	Mangam and Brooks 1997
103	NC	Edgecombe	Battleboro	36.0492	-77.7491	17	6	1995	Literature	Mangam and Brooks 1997
104	NC	Iredell	Statesville	35.7837	-80.8641	26	7	1995	Literature	Mangam and Brooks 1997
105	NC	Buncombe	Weaverville	35.6981	-82.566	5	7	1995	Literature	Mangam and Brooks 1997
106	NC	Wake	NC State, Raleigh	35.7846	-78.6821			1996	Literature	Mangam and Brooks 1997
107	NC	Caldwell	Lenoir	35.9045	-81.5346	25	6	1996	Literature	Mangam and Brooks 1997
108	NC	Surry	Mt. Airy	36.4997	-80.6055	27	6	1996	Literature	Mangam and Brooks 1997
109	NC	Cherokee	Murphy	35.0897	-84.0315	5	7	1996	Literature	Mangam and Brooks 1997
110	NC	Wake	Raleigh	35.8118	-78.6361			1997	Literature	Mangam and Sumner 2003
111	NC	Lenoir		35.2285	-77.6407	21-28	6	1997	Literature	Mangam and Sumner 2003
112	NC	Wayne		35.3816	-78.0002	21-28	6	1997	Literature	Mangam and Sumner 2003
113	NC	Johnston		35.5165	-78.3619	21-28	6	1997	Literature	Mangam and Sumner 2003
114	NC	Moore		35.3258	-79.4712	21-28	6	1997	Literature	Mangam and Sumner 2003
115	NC	Richmond		34.9657	-79.7208	21-28	6	1997	Literature	Mangam and Sumner 2003
116	NC	Vance		36.3645	-78.4074	21-28	6	1997	Literature	Mangam and Sumner 2003
117	NC	Warren		36.4016	-78.1004	21-28	6	1997	Literature	Mangam and Sumner 2003
118	NC	Greene		35.4778	-77.6819	21-28	6	1997	Literature	Mangam and Sumner 2003
119	NC	Wake		35.7993	-78.6483			1997	Literature	Mangam and Sumner 2003
120	SC	Marlboro		34.6003	-79.6594	22	6	1997	Literature	Mangam and Sumner 2003
121	SC	Darlington		34.3314	-79.9673	22	6	1997	Literature	Mangam and Sumner 2003
122	SC	Spartanburg		34.9393	-81.9855	17	7	1997	Literature	Mangam and Sumner 2003
123	GA	Oconee		33.8393	-83.4402			1997	Literature	Mangam and Sumner 2003
124	VA	Mecklenburg	South Hill	36.7261	-78.1278	24	6	1997	Literature	Mangam and Sumner 2003
125	VA	Prince George	Petersburg	37.202	-77.39	27	6	1997	Literature	Mangam and Sumner 2003
126	VA	Henrico	Richmond	37.5316	-77.4555	27	6	1997	Literature	Mangam and Sumner 2003
127	VA	Spotsylvania	Mary Washington College, Fredricksburg	38.3014	-77.4737	25	6	1997	Literature	Mangam and Sumner 2003
128	VA	Albemarle	University of Virginia, Charlottesville	38.0335	-78.508	25	6	1997	Literature	Mangam and Sumner 2003
129	VA	Montgomery		37.1667	-80.3724	18	6	1998	Literature	Mangam and Sumner 2003
130	VA	Rockingham	James Madison University, Harrisonburg	38.4351	-78.8698	25	6	1998	Literature	Mangam and Sumner 2003
131	VA	Greene	Standsville	38.2984	-78.4375	25	6	1998	Literature	Mangam and Sumner 2003
132	VA	Frederick		39.1811	-78.2405	25	7	1998	Literature	Mangam and Sumner 2003
133	VA	Frederick	Winchester	39.1754	-78.1712	27	7	1998	Literature	Mangam and Sumner 2003
134	VA	Spotsylvania	Fredericksburg	38.2971	-77.483	26-Jul to 2-Aug		1998	Literature	Mangam and Sumner 2003
135	MD	Allegany	Frostburg	39.6506	-78.9286	14	7	1998	Literature	Mangam and Sumner 2003
136	MD	Allegany	Frostburg	39.6506	-78.9286	15	7	1998	Literature	Mangam and Sumner 2003
137	MD	Allegany		39.6395	-78.6362	15	7	1998	Literature	Mangam and Sumner 2003
138	MD	Wicomico	Salisbury	38.3654	-75.592	1	8	2000	Literature	Mangam and Sumner 2003
139	DC		United States Capitol Building	38.8898	-77.0091	7	8	1998	Literature	Mangam and Sumner 2003
140	PA	Bedford	Breezewood	39.9999	-78.2388	18	7	1998	Literature	Mangam and Sumner 2003
141	PA	Franklin	Chambersburg	39.9347	-77.6522	18	7	1998	Literature	Mangam and Sumner 2003
142	PA	Jefferson		41.1149	-78.989		7	1998	Literature	Mangam and Sumner 2003
143	PA	Erie	Erie	42.1142	-80.0699	31	7	2001	Literature	Mangam and Sumner 2003
144	WV	Monongalia	Morgantown	39.6333	-79.9443	25	7	1998	Literature	Mangam and Sumner 2003
145	WV	Marshall	Wheeling	40.07	-80.6993	26	7	1998	Literature	Mangam and Sumner 2003
146	WV	Fayette	Kincaid	38.0409	-81.2701	3	8	1999	Literature	Mangam and Sumner 2003
147	OH	Harrison	Cadiz	40.2661	-80.9957	27	7	1998	Literature	Mangam and Sumner 2003
148	OH	Guernsey		40.0473	-81.4896	27	7	1998	Literature	Mangam and Sumner 2003
149	OH	Belmont	Ohio University, Eastern Campus	40.0735	-80.9748	27	7	1998	Literature	Mangam and Sumner 2003
150	OH	Belmont		40.0137	-80.9736	27	7	1998	Literature	Mangam and Sumner 2003
151	OH	Franklin	Columbus	39.9653	-82.9908	12	8	1999	Literature	Mangam and Sumner 2003
152	OH	Pickaway		39.6353	-83.0287	12	8	1999	Literature	Mangam and Sumner 2003
153	TN	Sullivan		36.5277	-82.3036	25	7	1999	Literature	Mangam and Sumner 2003
154	TN	Washington	Johnson City	36.3228	-82.3649	25	7	1999	Literature	Mangam and Sumner 2003
155	NJ	Middlesex		40.3884	-74.4398	7	8	2001	Literature	Mangam and Sumner 2003
156	CT	New Haven	Guilford	41.3247	-72.702	7	8	2001	Literature	Mangam and Sumner 2003
157	DE	Sussex		38.6683	-75.3789	17	7	1996	Literature	Mangam and Sumner 2003
158	NY	Chautauqua	Dunkirk	42.4786	-79.334	1	8	2001	Literature	Mangam and Sumner 2003
159	NY	Manhattan	New York City, Downtown Manhattan	40.7124	-74.0061				Literature	Matteson, et al. 2008
160	NY	Kings	Prospect Park, Brooklyn	40.6602	-73.969				Literature	Matteson, et al. 2008
161	ME	Cumberland	University of Southern Maine, Portland	43.6622	-70.2753	24	7	2008	Literature	Mazurkiewicz 2010
162	ME	Cumberland	Portland	43.678	-70.2932	18	7	2010	Literature	Mazurkiewicz 2010
163	ME	Cumberland	Portland	43.678	-70.2932	10	8	2010	Literature	Mazurkiewicz 2010
164	MD	Montgomery	Plummers Island, Maryland	38.9696	-77.1765				Literature	Norden 2008
165	MI	Cheboygan	Douglas Lake Area, University of Michigan Biological Station N45.561, W84.676	45.5586	-84.6775	5	7	2007	Literature	O'Brien and Craves 2008
166	MI	Wayne	Detroit River International Wildlife Refuge, Humbug Marsh Unit N42.1149, W83.1867	42.1149	-83.1867	8	8	2007	Literature	O'Brien and Craves 2008
167	MI	Wayne	Dearborn	42.3107	-83.2036	8	8	2007	Literature	O'Brien and Craves 2008
168	ON	Essex	Ojibway Prairie Provincial Nature Reserve, 42°15’N 83°4’W	42.2582	-83.0703	30	7	2002	Literature	Paiero and Buck 2003
169	ON	Essex	Point Pelee National Park, West Beach,	41.9624	-82.5187	29	7	2003	Literature	Paiero 2003
170	ON	Essex	Point Pelee National Park, West Beach,	41.9624	-82.5187	13	8	2003	Literature	Paiero and Buck 2003
171	ON	Halton	Nassagaweya Township, Twinbrooks Tract: LOCALITY NOT FOUND, USED CENTROID OF HALTON (MILTON)	43.5338	-79.9017	20	7	2002	Literature	Paiero 2003
172	VT	Chittenden	Sandbar Wildlife Management Area, Milton	44.6216	-73.2285		8	2005	Literature	Richardson 2005
173	TX	Walker	Huntsville	30.7103	-95.552		7	2014	Observation	This study	Pascarella, J (Sam Houston State University) personal communication
174	VA	Clarke	Blandy Exp. Farm, Boyce	39.3977	-77.8888	25	7	2012	Literature	Roulston and Malfi 2012
175	MA	Suffolk	Boston Harbor Islands national park area	42.3005	-70.9295				Literature	Ryyken 2007
176	QC		Montreal, Quebec, Canada	45.5017	-73.5671				Literature	Sheffield et al. 2011
177	NC	Wake	Centennial Campus, North Carolina State University, Raleigh, North Carolina,	35.7676	-78.6762	7-Jul to 9-Sept		1999	Literature	Thornton 2004
178	IL	Champaign	Urbana	40.1087	-88.203	28	6	2006	Literature	Tonietto and Ascher 2008
179	WI	Milwaukee	Lake Michigan Coastal	43.0292	-87.9015		9	2004	Literature	Wolf and Ascher 2009
180	WI	Dane	Cross Plains	43.1147	-89.6502			2007	Literature	Wolf and Ascher 2008
184	KY	Letcher	Deane, Letcher County, Kentucky, USA (Photo#888612, 888624)	37.2389	-82.7731	28	8	2013	Observation	Bugguide	http://bugguide.net/node/view/15541; Accessed 22-Aug-2015
185	NC	Chatham	Pittsboro, NC, Chatham County, North Carolina, USA (Photo# 808915, 808916, 808917)	35.7203	-79.175	20	7	2013	Observation	Bugguide	http://bugguide.net/node/view/15541; Accessed 22-Aug-2015
186	DE	New Castle	Bear, New Castle County, Delaware, USA (Photo#305695)	39.6187	-75.6793	16	7	2009	Observation	Bugguide	http://bugguide.net/node/view/15541; Accessed 22-Aug-2015
187	FL	Baker	Osceola Nat. For., Baker County, Florida, USA, (Photo # 59396)	30.263	-82.4319	7	6	2007	Observation	Bugguide	http://bugguide.net/node/view/15541; Accessed 22-Aug-2015
188	GA	Catoosa	Wilder Tower, Chickamauga Battlefield, Catoosa County, Georgia, USA (Photo# 22229, 22230)	34.9076	-85.2725	9	7	2004	Observation	Bugguide	http://bugguide.net/node/view/15541; Accessed 22-Aug-2015
189	GA	Cobb	Acworth, Cobb County, Georgia, USA (Photo#64355)	34.0494	-84.7017	16	7	2006	Observation	Bugguide	http://bugguide.net/node/view/15541; Accessed 22-Aug-2015
190	GA	Coweta	Coweta County, Georgia, USA (Photo#320607)	33.3763	-84.7802	15	8	2009	Observation	Bugguide	http://bugguide.net/node/view/15541; Accessed 22-Aug-2015
191	GA	Douglas	Moccasin Lake, Winston, Douglas County, Georgia, USA (Photo# 532854, 532856, 532857)	33.687	-84.8617	20	6	2011	Observation	Bugguide	http://bugguide.net/node/view/15541; Accessed 22-Aug-2015
192	GA	Ware	South Georgia, Ware County, Georgia, USA (Photo#120772, 120773)	30.8369	-82.4383	22	6	2007	Observation	Bugguide	http://bugguide.net/node/view/15541; Accessed 22-Aug-2015
193	IL	Cook	Bunker Hill Forest Preserve, Chicago, Cook County, Illinois, USA (Photo# 597324, 597324)	42.0067	-87.79	24	7	2011	Observation	Bugguide	http://bugguide.net/node/view/15541; Accessed 22-Aug-2015
194	IL	Cook	Spring Valley Nature Sanctuary, Cook County, Illinois, USA, (Photo# 325514, Spring Valley Nature Sanctuary, Cook County, Illinois, US5)	42.0246	-88.0538	20	7	2009	Observation	Bugguide	http://bugguide.net/node/view/15541; Accessed 22-Aug-2015
195	IL	Cook	Chicago, Cook County (Photo#147817)	41.8493	-87.7029	20	7	2007	Observation	Bugguide	http://bugguide.net/node/view/15541; Accessed 22-Aug-2015
196	IL	Lake	Reed-Turner Woodland Nature Preserve, Lake County, Illinois, USA (Photo# 995697)	42.1902	-88.0139	17	7	2014	Observation	Bugguide	http://bugguide.net/node/view/15541; Accessed 22-Aug-2015
197	IN	Hendricks	Danville, Hendricks County, Indiana, USA, (Photo# 544465, 544467)	39.7607	-86.5181	12	7	2011	Observation	Bugguide	http://bugguide.net/node/view/15541; Accessed 22-Aug-2015
198	IN	Orange	Paoli, Orange County, Indiana, USA, (Photo# 945863, 945864, 945865)	38.5566	-86.4687	27	6	2014	Observation	Bugguide	http://bugguide.net/node/view/15541; Accessed 22-Aug-2015
199	KS	Johnson	Olathe, Johnson County, Kansas, USA (Photo# 546211, 546207 and 546205, 546210)	38.8822	-94.8049	13	7	2011	Observation	Bugguide	http://bugguide.net/node/view/15541; Accessed 22-Aug-2015
200	KY	Daviess	Utica, Daviess County, Kentucky, USA (Photo# 897042)	37.6023	-87.1131	1	7	2010	Observation	Bugguide	http://bugguide.net/node/view/15541; Accessed 22-Aug-2015
201	KY	Letcher	Deane, Letcher County, Kentucky, USA (Photo# 945046, 945047)	37.2389	-82.7731	25	6	2014	Observation	Bugguide	http://bugguide.net/node/view/15541; Accessed 22-Aug-2015
202	MA	Essex	Newburyport, Essex County, Massachusetts, USA (Photo# 225804, 225805)	42.8112	-70.8772	14	9	2008	Observation	Bugguide	http://bugguide.net/node/view/15541; Accessed 22-Aug-2015
203	MA	Essex	Boxford, Essex County, Massachusetts, USA (Photo#216624)	42.6849	-71.0261	30	7	2008	Observation	Bugguide	http://bugguide.net/node/view/15541; Accessed 22-Aug-2015
204	MA	Hampshire	Northampton, Hampshire County, Massachusetts, USA (Photo# 30668)	42.3269	-72.66	3	9	2005	Observation	Bugguide	http://bugguide.net/node/view/15541; Accessed 22-Aug-2015
205	MA	Middlesex	Watertown, Middlesex County, Massachusetts, USA (Photo# 681264)	42.3699	-71.172	30	7	2014	Observation	Bugguide	http://bugguide.net/node/view/15541; Accessed 22-Aug-2015
206	MA	Middlesex	Watertown, Middlesex County, Massachusetts, USA (Photo# 981062, 981063)	42.3699	-71.172	4	7	2012	Observation	Bugguide	http://bugguide.net/node/view/15541; Accessed 22-Aug-2015
207	NJ	Middlesex	East Brunswick, Middlesex County, New Jersey, USA (Photo# 542793)	40.4259	-74.4143	9	7	2011	Observation	Bugguide	http://bugguide.net/node/view/15541; Accessed 22-Aug-2015
208	MA	Middlesex	Watertown, Middlesex County, Massachusetts, USA (Photo# 422159)	42.3699	-71.172	5	7	2010	Observation	Bugguide	http://bugguide.net/node/view/15541; Accessed 22-Aug-2015
209	MA	Middlesex	Medford, Middlesex County, Massachusetts, USA (Photo# 223706)	42.419	-71.1048	10	9	2008	Observation	Bugguide	http://bugguide.net/node/view/15541; Accessed 22-Aug-2015
210	MA	Middlesex	Medford, Middlesex County, Massachusetts, USA (Photo# 208142)	42.419	-71.1048	28	7	2008	Observation	Bugguide	http://bugguide.net/node/view/15541; Accessed 22-Aug-2015
211	IL	Champaign	Urbana, prairie restoration, Champaign County, Illinois, USA (Photo# 1101467, 1101468)	40.1087	-88.203	12	7	2015	Observation	Bugguide	http://bugguide.net/node/view/15541; Accessed 22-Aug-2015
212	IL	Champaign	Urbana, Champaign County, Illinois, USA (Photo# 825988, 825990, 825993)	40.1087	-88.203	13	8	2013	Observation	Bugguide	http://bugguide.net/node/view/15541; Accessed 22-Aug-2015
213	MA	Norfolk	Milton, Norfolk County, Massachusetts, USA (Photo# 836670, 836672, 836673, 836675)	42.245	-71.0832	15	7	2013	Observation	Bugguide	http://bugguide.net/node/view/15541; Accessed 22-Aug-2015
214	MA	Norfolk	Canton, Norfolk County, Massachusetts, USA (Photo# 26018, 26019, 26020)	42.168	-71.1347	20	7	2005	Observation	Bugguide	http://bugguide.net/node/view/15541; Accessed 22-Aug-2015
215	MA	Worcester	Lancaster, Worcester County, Massachusetts, USA (Photo# 15503, 15504, 15505)	42.4816	-71.6779	5	8	2004	Observation	Bugguide	http://bugguide.net/node/view/15541; Accessed 22-Aug-2015
216	MD	Anne Arundel	Patuxent Research Refuge North Tract, Anne Arundel County, Maryland, USA (Photo# 1015932, 1015933)	39.0791	-76.7975	31	7	2014	Observation	Bugguide	http://bugguide.net/node/view/15541; Accessed 22-Aug-2015
217	MD	Anne Arundel	Davidsonville, Anne Arundel County, Maryland, USA, (Photo# 95435, 95436)	38.923	-76.6286	3	8	2006	Observation	Bugguide	http://bugguide.net/node/view/15541; Accessed 22-Aug-2015
218	MD	Baltimore	Oak Meadow Farm, Reisterstown, Baltimore County, Maryland, USA (Photo# 959223, 959225)	39.453	-76.815	16	7	2014	Observation	Bugguide	http://bugguide.net/node/view/15541; Accessed 22-Aug-2015
219	MD	Baltimore City	Herring Run Park, Baltimore City County, Maryland, USA (Photo# 296273)	39.3319	-76.5757	29	6	2009	Observation	Bugguide	http://bugguide.net/node/view/15541; Accessed 22-Aug-2015
220	MD	Baltimore City	Herring Run Park, Baltimore City County, Maryland, USA (Photo# 295163, 295164)	39.3319	-76.5757	27	6	2009	Observation	Bugguide	http://bugguide.net/node/view/15541; Accessed 22-Aug-2015
221	MD	Kent	Eastern Neck National Wildlife Refuge, Kent County, Maryland, USA (Photo# 1087618, 1087619)	39.0331	-76.2305	20	6	2015	Observation	Bugguide	http://bugguide.net/node/view/15541; Accessed 22-Aug-2015
222	MD	Montgomery	Olney, 20832, Montgomery County, Maryland, USA (Photo# 1101099)	39.1504	-77.0703	13	7	2015	Observation	Bugguide	http://bugguide.net/node/view/15541; Accessed 22-Aug-2015
223	MD	Montgomery	Rockville, Montgomery County, Maryland, USA (Photo# 985482, 985483, 985485, 985487)	39.0822	-77.1547	24	8	2014	Observation	Bugguide	http://bugguide.net/node/view/15541; Accessed 22-Aug-2015
224	ME	York	Wells, York County, Maine, USA (Photo# 683205, 683206)	43.3276	-70.6261	1	8	2012	Observation	Bugguide	http://bugguide.net/node/view/15541; Accessed 22-Aug-2015
225	ME	Wayne	Dearborn, Wayne County, Michigan, USA (Photo# 561339)	42.3107	-83.2036	31	7	2011	Observation	Bugguide	http://bugguide.net/node/view/15541; Accessed 22-Aug-2015
226	ME	Wayne	Dearborn, Wayne County, Michigan, USA (Photo# 900465)	42.3107	-83.2036	3	7	2009	Observation	Bugguide	http://bugguide.net/node/view/15541; Accessed 22-Aug-2015
227	NC	Buncombe	Asheville, NC, Buncombe County, North Carolina, USA (Photo# 659562)	35.5939	-82.5407	9	6	2012	Observation	Bugguide	http://bugguide.net/node/view/15541; Accessed 22-Aug-2015
228	NC	Caswell	Prospect Hill, Caswell County, North Carolina, USA (Photo# 443813)	36.2494	-79.1909	17	8	2010	Observation	Bugguide	http://bugguide.net/node/view/15541; Accessed 22-Aug-2015
229	NC	Cumberland	Fort Bragg, Cumberland County, North Carolina, USA (Photo# 24649)	35.1398	-78.9943	18	7	2005	Observation	Bugguide	http://bugguide.net/node/view/15541; Accessed 22-Aug-2015
230	NC	Wake	Raleigh, Wake County, North Carolina, USA (Photo# 811888)	35.8118	-78.6361	26	7	2013	Observation	Bugguide	http://bugguide.net/node/view/15541; Accessed 22-Aug-2015
231	NE	Sarpy	Fontenelle Forest, Bellevue, Sarpy County, Nebraska, USA (Photo# 422451, 422452, 422453)	41.1797	-95.9178	10	7	2010	Observation	Bugguide	http://bugguide.net/node/view/15541; Accessed 22-Aug-2015
232	NH	Cheshire	Keene, Cheshire County, New Hampshire, USA (Photo# 965263)	42.9443	-72.2919	26	7	2014	Observation	Bugguide	http://bugguide.net/node/view/15541; Accessed 22-Aug-2015
233	NJ	Atlantic	Port Republic, Atlantic County, New Jersey, USA (Photo# 129734, 129735, 129736)	39.535	-74.4805	22	7	2007	Observation	Bugguide	http://bugguide.net/node/view/15541; Accessed 22-Aug-2015
234	NJ	Bergen	Lyndhurst, Bergen County, New Jersey, USA (Photo# 957489, 957490)	40.804	-74.1105	14	7	2014	Observation	Bugguide	http://bugguide.net/node/view/15541; Accessed 22-Aug-2015
235	NY	Dutchess	41.44°N x 73.63°W, Dutchess County, New York, USA (Photo# 307110)	41.44	-73.63	14	7	2007	Observation	Bugguide	http://bugguide.net/node/view/15541; Accessed 22-Aug-2015
236	NY	Kings	Brooklyn Botanic Garden, Kings County, New York, USA (Photo# 983573, 983574)	40.666	-73.9621	24	8	2014	Observation	Bugguide	http://bugguide.net/node/view/15541; Accessed 22-Aug-2015
237	NY	Kings	Brooklyn Botanic Garden, Kings County, New York, USA (Photo# 424540, 424543)	40.666	-73.9621	10	7	2010	Observation	Bugguide	http://bugguide.net/node/view/15541; Accessed 22-Aug-2015
238	NY	Kings	Brooklyn, Kings County, New York, USA (Photo# 40848)	40.6459	-73.9423	29	7	2005	Observation	Bugguide	http://bugguide.net/node/view/15541; Accessed 22-Aug-2015
239	NY	Monroe	Rochester, Monroe County, New York, USA (Photo# 548571)	43.1605	-77.6116	19	7	2011	Observation	Bugguide	http://bugguide.net/node/view/15541; Accessed 22-Aug-2015
240	NY	Monroe	Rochester, Monroe County, New York, USA (Photo# 545479, 545480)	43.1605	-77.6116	14	7	2011	Observation	Bugguide	http://bugguide.net/node/view/15541; Accessed 22-Aug-2015
241	PA	Monroe	Kunkletown, Monroe County, Pennsylvania, USA (Photo# 540554)	40.8479	-75.4483	5	7	2011	Observation	Bugguide	http://bugguide.net/node/view/15541; Accessed 22-Aug-2015
242	NY	Monroe	Rochester, Monroe County, New York, USA (Photo# 438482, 438483)	43.1605	-77.6116	7	8	2010	Observation	Bugguide	http://bugguide.net/node/view/15541; Accessed 22-Aug-2015
243	MI	Monroe	Near Toledo, Bedford Township, Monroe County, Michigan, USA (Photo# 126611)	41.7773	-83.5915	12	7	2007	Observation	Bugguide	http://bugguide.net/node/view/15541; Accessed 22-Aug-2015
244	NY	Nassau	William Cullen Bryant Preserve, Nassau County, New York, USA (Photo# 968105)	40.8102	-73.6411	30	7	2014	Observation	Bugguide	http://bugguide.net/node/view/15541; Accessed 22-Aug-2015
245	NY	Nassau	Roslyn Harbor/William Cullen Bryant Preserve, Nassau County, New York, USA (Photo# 552873)	40.8102	-73.6411	26	7	2011	Observation	Bugguide	http://bugguide.net/node/view/15541; Accessed 22-Aug-2015
246	NY	Nassau	William Cullen Bryant Preserve, Nassau County, New York, USA (Photo# 968105)	40.8102	-73.6411	15	7	2010	Observation	Bugguide	http://bugguide.net/node/view/15541; Accessed 22-Aug-2015
247	NY	Nassau	Underhill Preserve, Nassau County, New York, USA (Photo# 213744)	40.7716	-73.5579	13	8	2008	Observation	Bugguide	http://bugguide.net/node/view/15541; Accessed 22-Aug-2015
248	NY	New York	Manhattan, New York County, New York, USA (Photo# 211356, 211357, 211362)	40.7769	-73.9682	7	8	2008	Observation	Bugguide	http://bugguide.net/node/view/15541; Accessed 22-Aug-2015
249	NY	New York	Central Park, New York County, New York, USA (Photo# 73123, 73124)	40.7769	-73.9682	20	8	2006	Observation	Bugguide	http://bugguide.net/node/view/15541; Accessed 22-Aug-2015
250	NY	Orange	Goshen, Orange County, New York, USA (Photo# 957911)	41.4017	-74.3256	15	7	2004	Observation	Bugguide	http://bugguide.net/node/view/15541; Accessed 22-Aug-2015
251	NY	Richmond	Staten Island, Richmond County, New York, USA (Photo# 40966, 40967)	40.5749	-74.1503	25	6	2004	Observation	Bugguide	http://bugguide.net/node/view/15541; Accessed 22-Aug-2015
252	NY	Saratoga	southern Adirondack Mts., Saratoga County, New York, USA (Photo# 1025233)	43.1923	-74.5216	5	7	2013	Observation	Bugguide	http://bugguide.net/node/view/15541; Accessed 22-Aug-2015
253	NY	Steuben	Hammondsport, Steuben County, New York, USA (Photo# 161659)	42.4073	-77.223	12	9	2007	Observation	Bugguide	http://bugguide.net/node/view/15541; Accessed 22-Aug-2015
254	NY	Suffolk	Southold/Horton Point, Suffolk County, New York, USA (Photo# 976341, 976343)	41.0851	-72.4456	10	8	2014	Observation	Bugguide	http://bugguide.net/node/view/15541; Accessed 22-Aug-2015
255	NY	Tompkins	Ithaca NY, Tompkins County, New York, USA (Photo# 559253)	42.4428	-76.4991	7	8	2011	Observation	Bugguide	http://bugguide.net/node/view/15541; Accessed 22-Aug-2015
256	NY	Tompkins	Ithaca NY, Tompkins County, New York, USA (Photo# 877788)	42.4428	-76.4991	25	7	2010	Observation	Bugguide	http://bugguide.net/node/view/15541; Accessed 22-Aug-2015
257	OH	Franklin	Ohio State University, Franklin County, Ohio, USA (Photo# 65904, 65905, 65906)	40.0142	-83.0309	21	7	2006	Observation	Bugguide	http://bugguide.net/node/view/15541; Accessed 22-Aug-2015
258	OH	Greene	Beavercreek, Greene County, Ohio, USA (Photo# 683728, 683730, 683732, 683733)	39.7238	-84.0321	3	7	2012	Observation	Bugguide	http://bugguide.net/node/view/15541; Accessed 22-Aug-2015
259	OH	Greene	Beavercreek, Greene County, Ohio, USA (Photo# 678782, 678783)	39.7238	-84.0321	1	7	2012	Observation	Bugguide	http://bugguide.net/node/view/15541; Accessed 22-Aug-2015
260	OH	Richland	Mansfield, Richland County, Ohio, USA (Photo# 975807)	40.7576	-82.5674	7	8	2014	Observation	Bugguide	http://bugguide.net/node/view/15541; Accessed 22-Aug-2015
261	PA	Adams	Adams County, Pennsylvania, USA (Photo# 127173, 127175, 127176)	39.8493	-77.2123	14	7	2007	Observation	Bugguide	http://bugguide.net/node/view/15541; Accessed 22-Aug-2015
262	PA	Bucks	Buckingham, Bucks County, Pennsylvania, USA (Photo# 751106)	40.3185	-75.059	11	8	2012	Observation	Bugguide	http://bugguide.net/node/view/15541; Accessed 22-Aug-2015
263	PA	Bucks	Churchville PA USA, Bucks County, Pennsylvania, USA (Photo# 546629, 546630)	40.1998	-74.998	15	7	2011	Observation	Bugguide	http://bugguide.net/node/view/15541; Accessed 22-Aug-2015
264	PA	Bucks	Peace Valley Nature Center, Bucks County, Pennsylvania, USA (Photo# 60584)	40.3399	-75.1715	30	6	2006	Observation	Bugguide	http://bugguide.net/node/view/15541; Accessed 22-Aug-2015
265	PA	Clarion	Clarion County, Pennsylvania, USA (Photo# 967010)	41.1894	-79.4334	27	7	2014	Observation	Bugguide	http://bugguide.net/node/view/15541; Accessed 22-Aug-2015
266	PA	Franklin	Chambersburg, Franklin County, Pennsylvania, USA (Photo# 550695)	39.9351	-77.6543	5	7	2011	Observation	Bugguide	http://bugguide.net/node/view/15541; Accessed 22-Aug-2015
267	PA	Juniata	Thompsontown, Juniata County, Pennsylvania, USA (Photo# 543149, 543150, 543151)	40.566	-77.2363	10	7	2011	Observation	Bugguide	http://bugguide.net/node/view/15541; Accessed 22-Aug-2015
268	PA	Lancaster	Lancaster County, Pennsylvania, USA (Photo# 824961)	40.0463	-76.2332	15	8	2013	Observation	Bugguide	http://bugguide.net/node/view/15541; Accessed 22-Aug-2015
269	PA	Lancaster	Mountville, Lancaster County, Pennsylvania, USA (Photo# 40086)	40.0394	-76.4342	17	7	2005	Observation	Bugguide	http://bugguide.net/node/view/15541; Accessed 22-Aug-2015
270	PA	Lehigh	Easton, Lehigh County, Pennsylvania, USA (Photo# 324886)	40.6912	-75.2092	10	7	2009	Observation	Bugguide	http://bugguide.net/node/view/15541; Accessed 22-Aug-2015
271	PA	Northumberland	Elysburg, Northumberland County, Pennsylvania, USA (Photo# 206508)	40.8671	-76.5492	24	7	2008	Observation	Bugguide	http://bugguide.net/node/view/15541; Accessed 22-Aug-2015
272	PA	Perry	Perry County, Pennsylvania, USA (photo# 419882)	40.4013	-77.248	1	7	2010	Observation	Bugguide	http://bugguide.net/node/view/15541; Accessed 22-Aug-2015
273	PA	Perry	Perry County, Pennsylvania, USA (Photo# 206617, 206618)	40.4013	-77.248	27	7	2008	Observation	Bugguide	http://bugguide.net/node/view/15541; Accessed 22-Aug-2015
274	PA	Philadelphia	Philadelphia, Philadelphia County, Pennsylvania, USA (Photo# 968078)	39.9919	-75.1064	30	7	2014	Observation	Bugguide	http://bugguide.net/node/view/15541; Accessed 22-Aug-2015
275	PA	Philadelphia	Philadelphia, Philadelphia County, Pennsylvania, USA (Photo# 846501, 846502, 846503, 846504)	39.9919	-75.1064	18	9	2013	Observation	Bugguide	http://bugguide.net/node/view/15541; Accessed 22-Aug-2015
276	PA	Sullivan	Eagles Mere, Sullivan County, Pennsylvania, USA (Photo# 617592)	41.4091	-76.5835	26	7	2011	Observation	Bugguide	http://bugguide.net/node/view/15541; Accessed 22-Aug-2015
277	SC	Greenwood	Greenwood County, South Carolina, USA (Photo# 71656)	34.1502	-82.1027	9	7	2006	Observation	Bugguide	http://bugguide.net/node/view/15541; Accessed 22-Aug-2015
278	VA	Arlington	Arlington County, Virginia, USA (Photo# 72074)	38.8735	-77.086	9	8	2006	Observation	Bugguide	http://bugguide.net/node/view/15541; Accessed 22-Aug-2015
279	VT	Bennington	Woodford, Bennington County, Vermont, US (Photo# 674512, 674516, 674521)	42.883	-73.0806	14	7	2012	Observation	Bugguide	http://bugguide.net/node/view/15541; Accessed 22-Aug-2015
280	VT	Chittenden	Burlington, Chittenden County, Vermont, USA (Photo# 1111241, 1111242, 1111243, 1111245)	44.476	-73.2107	28	7	2015	Observation	Bugguide	http://bugguide.net/node/view/15541; Accessed 22-Aug-2015
281	WI	Dane	Cross Plains, Dane County, Wisconsin, USA (Photo# 125905)	43.1147	-89.6502	9	7	2007	Observation	Bugguide	http://bugguide.net/node/view/15541; Accessed 22-Aug-2015
282	WV	Randolph	West Fork Rail Trail, Randolph County, West Virginia, USA (Photo# 81973)	38.5646	-79.8269	8	7	2006	Observation	Bugguide	http://bugguide.net/node/view/15541; Accessed 22-Aug-2015
283	RI	Providence	Roger Williams Park and Zoo	41.788	-71.4147			before 2005	Literature	Maier 2005
284	IA	Jefferson	Fairfield, on Locust Tree	41.0068	-91.9641	24	7	2007	Observation	Flickr	https://www.flickr.com/photos/91575473@N00/1068972534/; Accessed 30-Aug-2015; W. Honeycutt, personal communication
285	RI	Washington	URI East Farm South Kingstown	41.4732	-71.5123	30	7	2014	Specimen	This study	Scott, Z (University of RI) personal communication
61122	NJ	Middlesex	East Brunswick, New Jersey, United States	40.4197	-74.4022	20	7	2007	Observation	GBIF-iNaturalist	http://www.gbif.org/species/1335213; Data downloaded on 19-Aug-2015
103892	OH	Summit	25 East Ave, Tallmadge, Ohio, US	41.1023	-81.437	20	7	2012	Observation	GBIF-iNaturalist	http://www.gbif.org/species/1335213; Data downloaded on 19-Aug-2015
104247	OH	Summit	Tallmadge, OH	41.1014	-81.4418	21	7	2012	Observation	GBIF-iNaturalist	http://www.gbif.org/species/1335213; Data downloaded on 19-Aug-2015
531167	DC		Dumbarton Oaks Garden	38.9151	-77.0632	11	7	2013	Observation	GBIF-iNaturalist	http://www.gbif.org/species/1335213; Data downloaded on 19-Aug-2015
610927	MA	Suffolk	Great Brewster Island	42.3325	-70.8964	16	8	2006	Online database	GBIF-MCZ	http://www.gbif.org/species/1335213; Data downloaded on 19-Aug-2015
610928	MA	Plymouth	World's End	42.2639	-70.8769	30	8	2006	Online database	GBIF-MCZ	http://www.gbif.org/species/1335213; Data downloaded on 19-Aug-2015
610929	MA	Suffolk	Thompson Island	42.3172	-71.0086	13	7	2007	Online database	GBIF-MCZ	http://www.gbif.org/species/1335213; Data downloaded on 19-Aug-2015
610930	MA	Suffolk	Snake Island	42.3661	-70.9794	24	7	2007	Online database	GBIF-MCZ	http://www.gbif.org/species/1335213; Data downloaded on 19-Aug-2015
610931	MA	Suffolk	Calf Island	42.3411	-70.8961	12	7	2007	Online database	GBIF-MCZ	http://www.gbif.org/species/1335213; Data downloaded on 19-Aug-2015
610932	MA	Suffolk	Lovells Island	42.3292	-70.9272	16	7	2007	Online database	GBIF-MCZ	http://www.gbif.org/species/1335213; Data downloaded on 19-Aug-2015
610933	MA	Suffolk	Lovells Island	42.328	-70.9264	13	8	2007	Online database	GBIF-MCZ	http://www.gbif.org/species/1335213; Data downloaded on 19-Aug-2015
610934	MA	Suffolk	Great Brewster Island	42.3325	-70.8964	15	7	2008	Online database	GBIF-MCZ	http://www.gbif.org/species/1335213; Data downloaded on 19-Aug-2015
780839	DC		2605 24th St NW, Washington, DC, US	38.9237	-77.0524	13	7	2014	Observation	GBIF-iNaturalist	http://www.gbif.org/species/1335213; Data downloaded on 19-Aug-2015
802601	MD	Caroline	Greensboro Christian Park	39.0003	-75.7878	25	7	2014	Observation	GBIF-iNaturalist	http://www.gbif.org/species/1335213; Data downloaded on 19-Aug-2015
817978	MA	Middlesex	Middlesex, Massachusetts, United States	42.4063	-71.3313	5	8	2014	Observation	GBIF-iNaturalist	http://www.gbif.org/species/1335213; Data downloaded on 19-Aug-2015
1087006	VA	Virginia Beach	Virginia Beach, VA	36.8471	-76.1257	28	7	2013	Observation	GBIF-iNaturalist	http://www.gbif.org/species/1335213; Data downloaded on 19-Aug-2015
1249707	NJ	Bergen	Richard W DeKorte Park	40.779	-74.1065	14	7	2014	Observation	GBIF-iNaturalist	http://www.gbif.org/species/1335213; Data downloaded on 19-Aug-2015
1413981	NC	Davie	Mocksville, North Carolina	35.894	-80.5614	18	6	2012	Observation	GBIF-iNaturalist	http://www.gbif.org/species/1335213; Data downloaded on 19-Aug-2015
1647856	OH	Licking	Alexandria	40.1009	-82.6258	19	6	2015	Observation	GBIF-iNaturalist	http://www.gbif.org/species/1335213; Data downloaded on 19-Aug-2015
1750021	OH	Summit	haley's run akron ohio	41.046	-81.4722	11	7	2015	Observation	GBIF-iNaturalist	http://www.gbif.org/species/1335213; Data downloaded on 19-Aug-2015
1823927	OH	Richland	Mansfield, OH	40.7576	-82.5674	27	7	2015	Observation	GBIF-iNaturalist	http://www.gbif.org/species/1335213; Data downloaded on 19-Aug-2015
BBSL743795	VA	Clarke	Blandy Exp. Farm	39.0637	-78.0644	21	8	2001	Online database	GBIF-BBSL	http://www.gbif.org/species/1335213; Data downloaded on 19-Aug-2015
BBSL743796	VA	Clarke	Blandy Exp. Farm	39.0637	-78.0644	21	8	2001	Online database	GBIF-BBSL	http://www.gbif.org/species/1335213; Data downloaded on 19-Aug-2015
BBSL743799	VA	Clarke	Blandy Exp. Farm	39.0637	-78.0644	21	8	2001	Online database	GBIF-BBSL	http://www.gbif.org/species/1335213; Data downloaded on 19-Aug-2015
BBSL743800	VA	Clarke	Blandy Exp. Farm	39.0637	-78.0644	21	8	2001	Online database	GBIF-BBSL	http://www.gbif.org/species/1335213; Data downloaded on 19-Aug-2015
BBSL815806	NY	Tompkins	Ithaca, E Seneca St	42.4502	-76.488	16	8	2009	Online database	GBIF-BBSL	http://www.gbif.org/species/1335213; Data downloaded on 19-Aug-2015
BBSL816570	NY	Tompkins	Ithaca, Cornell campus, Beebe Lake	42.451	-76.4762	14	7	2010	Online database	GBIF-BBSL	http://www.gbif.org/species/1335213; Data downloaded on 19-Aug-2015
BBSL849734	VA	Clarke	Blandy Exp. Farm	39.0637	-78.0644	21	8	2001	Online database	GBIF-BBSL	http://www.gbif.org/species/1335213; Data downloaded on 19-Aug-2015
BBSL849735	VA	Clarke	Blandy Exp. Farm	39.0637	-78.0644	21	8	2001	Online database	GBIF-BBSL	http://www.gbif.org/species/1335213; Data downloaded on 19-Aug-2015
BBSL849737	VA	Clarke	Blandy Exp. Farm	39.0637	-78.0644	21	8	2001	Online database	GBIF-BBSL	http://www.gbif.org/species/1335213; Data downloaded on 19-Aug-2015
BBSL849738	VA	Clarke	Blandy Exp. Farm	39.0637	-78.0644	21	8	2001	Online database	GBIF-BBSL	http://www.gbif.org/species/1335213; Data downloaded on 19-Aug-2015
FL12D-MS007	FL	Alachua	University of Florida, Gainesville	29.6504	-82.3424	8	7	2013	Specimen	This study	BLCU, AD Tripodi Collection
LA9G-MS004	LA	West Feliciana	St Francisville	30.7927	-91.2498	4	7	2013	Specimen	This study	AD Tripodi Collection
MS001	AR	Benton	Searles Prairie, Rogers	36.3564	-94.1442	20	6	2012	Specimen	This study	BLCU
MS002	AR	Benton	Chesney Prairie, Gentry	36.2216	-94.4844	20	6	2012	Specimen	This study	BLCU
MS003	AR	Madison	Hindsville (In Xylocopa virginica trap)	36.2064	-93.8503	19	6	2012	Specimen	This study	BLCU
MS008-UFL001-UFL055	FL	Alachua	University of Florida, Gainesville	29.6504	-82.3424	21	6	2015	Specimen	This study	BLCU, AD Tripodi Collection
MS009	MI	Berrien	MI01; Watervliet, MI	42.1794	-86.2587	31	7	2015	Specimen	This study	BLCU, AD Tripodi Collection
MS4B-MS005/6	MS	Lafayette	University of Mississippi, Oxford	34.3652	-89.534	12	7	2013	Specimen	This study	BLCU
OSUC 439040	OH	Franklin	Columbus, in house, Franklin Co., OH	39.9611	-82.9989	15	5	2006	Online database	GBIF-OSUC	http://www.gbif.org/species/1335213; Data downloaded on 19-Aug-2015
OSUC 439041	OH	Franklin	Columbus, in house, Franklin Co., OH	39.9611	-82.9989	15	5	2006	Online database	GBIF-OSUC	http://www.gbif.org/species/1335213; Data downloaded on 19-Aug-2015
OSUC 84447	OH	Ashtabula	North Kingsville Sand Barrens, Ashtabula Co., OH	41.9058	-80.6906	20	7	2002	Online database	GBIF-OSUC	http://www.gbif.org/species/1335213; Data downloaded on 19-Aug-2015
OSUC 84448	OH	Ashtabula	North Kingsville Sand Barrens, Ashtabula Co., OH	41.9058	-80.6906	26	7	2002	Online database	GBIF-OSUC	http://www.gbif.org/species/1335213; Data downloaded on 19-Aug-2015
YPM ENT 829496	CT	Fairfield	Westport, 6 North Pasture Road	41.1356	-73.3496	31	7	2011	Online database	GBIF-YPM	http://www.gbif.org/species/1335213; Data downloaded on 19-Aug-2015
YPM ENT 829497	CT	Fairfield	Westport, 6 North Pasture Road	41.1356	-73.3496	31	7	2011	Online database	GBIF-YPM	http://www.gbif.org/species/1335213; Data downloaded on 19-Aug-2015

## Sheet: refs
References:
Ascher JS (2001) Hylaeus hyalinatus Smith, a European bee new to North America, with notes on other adventive bees (Hymenoptera: Apoidea). Proceedings of the Entomological Society of Washington 103: 184-190.
Ascher JS, Kornbluth S, Goelet RG (2014) Bees (Hymenoptera: Apoidea: Anthophila) of Gardiners Island, Suffolk County, New York. Northeastern Naturalist 21: 47-71.
Batra SWT (1998) Biology of the giant resin bee, Megachile sculpturalis Smith, a conspicuous new immigrant in Maryland. The Maryland Naturalist 42: 1-3.
Droege SW, Shapiro LH (2011) An August survey of wild bees (Hymenoptera: Apoidea) in the Northeastern port areas of Baltimore, Maryland and the second North American record of Pseudoanthidium nanum(Mocsary). The Maryand Entomologist 5: 33-44.
Groves RL, Lowenstein D, Halfman B (2010) Vine crop pest management and pollinators. Proceedings of the 2010 Wisconsin Crop Management Conference 49: 88-92.
Hall HG, Ascher JS (2010) Surveys of Bees (Hymenoptera: Apoidea: Anthophila) in Natural Areas of Alachua County in North-Central Florida. Florida Entomologist 93: 609-629.
Hinojosa-Díaz I (2008) The giant resin bee making its way west: First record in Kansas (Hymenoptera: Megachilidae). ZooKeys 1: 67-71.
Kinyo, AS (2005) Effects of distance from invasive Lythrum salicaria on pollinator visitation rate and reproductive success in native Lythrum alatum. Master of Science Thesis, The University of Akron, Akron, Ohio.
Kondo T, Williams ML, Minckley R (2000) Giant resin bees! Exotic bee species makes it way from east coast to Alabama. Alabama Agricultural Experiment Station Highlights of Agricultural Research 27: 5-6.
Laport RG, Minckley RL (2012) Occupation of active Xylocopa virginica nests by the recently invasive Megachile sculpturalis in Upstate New York. Journal of the Kansas Entomological Society 85: 384-386.
Maier CT (2005) First records of alien insects in Connecticut (Orthoptera: Tettigoniidae; Coleoptera: Buprestidae, Chrysomelidae; Diptera: Rhagionidae, Tephritidae; Hymenoptera: Megachilidae). Proceedings of the Entomological Society of Washington 107: 947-959.
Maier CT (2006) New distributional records of three alien species of Megachilidae (Hymenoptera) from Connecticut and nearby states. Proceedings of the Entomological Society of Washington 111:775-784.
Mangum WA, Brooks RW (1997) First records of Megachile (Callomegachile) sculpturalis Smith (Hymenoptera: Megachilidae) in the Continental United States. Journal of the Kansas Entomological Society 70: 140-142.
Mangum WA, Sumner S (2003) A survey of the North American range of Megachile (Callomegachile) sculpturalis, an adventive species in North America. Journal of the Kansas Entomological Society 76: 658-662.
Matteson KC, Ascher JS, Langellotto GA (2008) Bee richness and abundance in New York City urban gardens. Annals of the Entomological Society of America 101: 140-150.
Mazurkiewicz M (2010) The giant resin bee, Megachile sculpturalis, in Maine: a New State Record. The Maine Entomologist 14: 3.
Norden BB (2008) A checklist of the bees (Insecta: Hymenoptera) and their floral hosts at Plummers Island, Maryland. Bulletin of the Biological Society of Washington 15: 168-172.
O'Brien MF, Craves J (2008) Megachile sculpturalis Smith - A new bee for Michigan (Hymenoptera: Megachile). Newsletter of the Michigan Entomological Society 53: 4.
Paiero SM, Buck M (2003) The giant resin bee, Megachile sculpturalis Smith, and other newly introduced and newly recorded native Megachilidae and Andrenidae (Apoidea) from Ontario. Journal of the Entomological Society of Ontario 134: 141-143.
Richardson L (2005) Vermont's newest bee species. The Newsletter of the Vermont Entomological Society 49: 11.
Roulston T, Malfi R (2012) Aggressive eviction of the Eastern carpenter bee (Xylocopa virginica (Linnaeus)) from its nest by the giant resin bee (Megachile sculpturalis Smith). Journal of the Kansas Entomological Society 85: 387-388.
Ryyken J (2007) All-taxa inspiration in Boston. The Newsletter of the Vermont Entomological Society 55: 7, 11.
Sheffield CS, Dumesh S, Cheryomina M (2011) Hylaeus punctatus (Hymenoptera: Colletidae), a bee species new to Canada, with notes on other non-native species. Journal of the Entomological Society of Ontario 42: 29-43.
Thornton MR (2004) Arthropod fauna associated with kudzu (Pueraria montana var. lobata Willd.) in North Carolina. Master of Science Thesis, North Carolina State University Raleigh, North Carolina.
Tonietto RK, Ascher JS (2008) Occurance of the old world bee species Hylaeus hyalinatus, Anthidium manicatum, A. oblongatum, and Megachile sculpturalis, and the native species Coelioxys banksi, Lasioglossum michiganense, and L. zophops in Illinois (Hymenoptera: Apoidea: Colletidae, Halictidae, Megachilidae). Great Lakes Entomologist 41: 200-203.
Wolf AT, Ascher JS (2008) Bees of Wisconsin (Hymenoptera: Apoidea: Anthophila). Great Lakes Entomologist 41: 129-168.

## Sheet: metadata
Column header	Description
UID	Unique identifier. Numbers 1-285 were arbitrarily assigned when no number was associated with the datum by the source.
ST	State. Also Province in Canadian cases.
County	County Name. Used to infer coordinates when finer-scale information was not available.
Locality details	Locality from specimen lable or data record record. Used to infer coordinates when coordinates were not available.
Inferred Latitude	Longitude coordinate as provided on specimen label or within data record. Inferred when not explicitly available.
Inferred Longitude	Latitude coordinate as provided on specimen label or within data record. Inferred when not explicitly available.
Day	Collection or recording day
Month	Collection or recording month
Year	Collection or recording year
Type	Type of record
Source	Source of record
Deposition	Collections into which specimens were deposited in this study
